# Supplementary material for: La protesta consumada
Source: MDPI journal article supplement (doi:10.3390/foods12142696), 2009-01-01
Supplement: s1 [file s1]

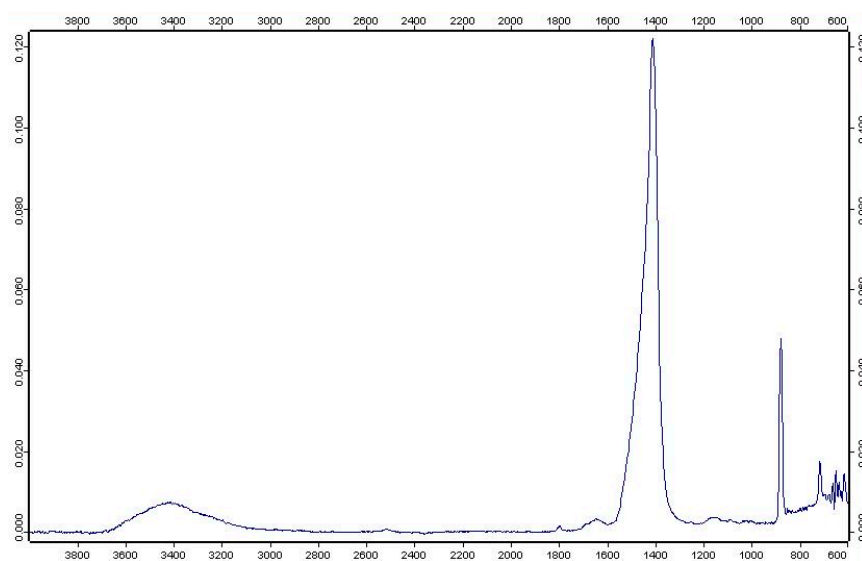

**Supplementary Figure S1** IR spectra of oyster shell powders.

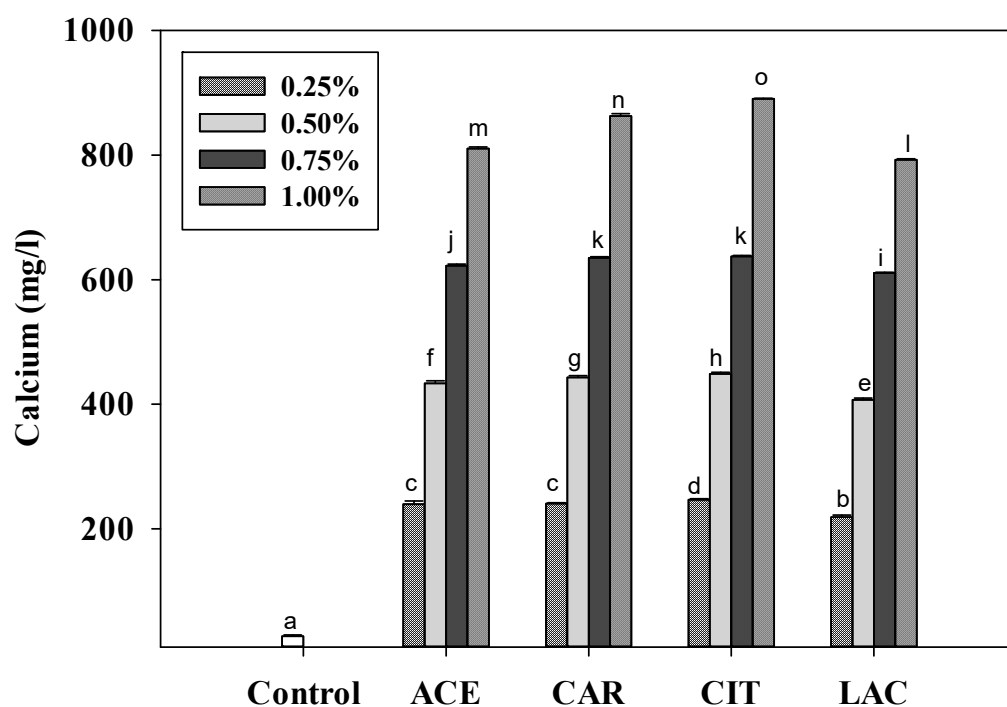

**Supplementary Figure S2** Effect of kinds and amounts of calcium salts on the calcium content of drying noodles.

ACE, Calcium acetate; CAR, Calcium carbonate; CIT, Calcium citrate; LAC, Calcium lactate.
